# Supplementary material
Source: Springer Nature journal article supplement (https://www.springermedizin.de/resource/supplementary/12885_2012_3627_MOESM2_ESM.pdf/9464560)
Supplement: MOESM2 [file 9464560]

**Table 4: Socio-demographic correlates of cervical cancer knowledge of women in Gondar town, Ethiopia, April 2010.**

| Variables                         | Knowledge of cervical cancer |            | Crude OR (95% CI) | Adjusted OR (95% CI) | P-value |
|-----------------------------------|------------------------------|------------|-------------------|----------------------|---------|
|                                   | Yes                          | No         |                   |                      |         |
| <b>Age</b>                        |                              |            |                   |                      |         |
| 15-24                             | 69(39.9%)                    | 104(60.1%) | 1.73 (.93-3.23)   | 1.43 (.35-5.93)      | .618    |
| 25-34                             | 69(45.7%)                    | 82(54.3%)  | 2.20 (1.17-4.13)  | 3.95 (1.10-14.18)*   | .035    |
| 35-44                             | 39(36.8%)                    | 67(63.2%)  | 1.52 (.78-2.98)   | 1.65 (.45-6.10)      | .452    |
| 45+                               | 18(27.7%)                    | 47(72.3%)  | 1.00              | 1.00                 |         |
| <b>Marital status</b>             |                              |            |                   |                      |         |
| Single                            | 71(40.1%)                    | 106(59.9%) | 1.00              |                      |         |
| Married                           | 91(39.7%)                    | 138(60.3%) | 0.98(0.66-1.47)   | **                   |         |
| Divorced                          | 18(48.6%)                    | 19(51.4%)  | 1.41(0.69-2.88)   |                      |         |
| Widowed                           | 159(18.8%)                   | 37(71.2%)  | 0.61(0.31-1.18)   |                      |         |
| <b>Educational status</b>         |                              |            |                   |                      |         |
| No formal education               | 31(27.0%)                    | 84(73.0%)  | 1.00              | 1.00                 |         |
| Primary education (1-8)           | 19(26.8%)                    | 52(73.2%)  | .99 (.51-1.93)    | .89(.27-2.89)        | .829    |
| Secondary education & Above       | 145(46.9%)                   | 164(53.1%) | 2.37( 1.50-3.83)  | 3.46(1.32-9.07)*     | .011    |
| <b>Husband's education, N=213</b> |                              |            |                   |                      |         |
| No formal education               | 10(27.8%)                    | 26(77.2%)  | 1.00              | 1.00                 |         |
| Primary education (1-8)           | 4(12.1%)                     | 29(87.9%)  | .36(.10-1.28)     | .45(.10-1.98)        | .291    |
| Secondary education & Above       | 74(51.4%)                    | 70(48.6%)  | 2.75 (1.24-6.11)  | 1.28(.34-4.83)       | .716    |
| <b>Occupation</b>                 |                              |            |                   |                      |         |
| Employed                          | 109(44.0%)                   | 139(56.0%) | 2.07 (1.34-3.20)  | 1.66(.59-4.64)       | .336    |
| Student                           | 44(46.8%)                    | 50(53.2%)  | 2.33 (1.36-3.99)  | 1.88(.37-9.62)       | .586    |
| Not employed                      | 42(27.5%)                    | 111(72.5%) | 1.00              | 1.00                 | .682    |
| <b>Monthly household income</b>   |                              |            |                   |                      |         |
| Low                               | 40(34.5%)                    | 76(65.5%)  | 1.00              | 1.00                 |         |
| Medium                            | 78(31.5%)                    | 170(68.5%) | 0.87(.55-1.39)    | .39(.11-1.39)        | .147    |
| High                              | 77(58.8%)                    | 54(41.2%)  | 2.71(1.62-4.55)   | 1.20(.31-4.68)       | .793    |
| <b>Parity</b>                     |                              |            |                   |                      |         |
| 0                                 | 79(43.2%)                    | 104(56.8%) | 1.00              |                      |         |
| 1                                 | 20(40.8%)                    | 29(59.2%)  | .91(.48-1.72)     | **                   |         |
| 2-4                               | 77(38.9%)                    | 121(61.1%) | .84(.56-1.26)     |                      |         |
| 5+                                | 19(29.2%)                    | 46(70.8%)  | .54 (.30-1.00)    |                      |         |

-Average knowledge score=4.5

\* Statistically significant

\*\* Insignificant variables in the crude analysis were omitted from the multivariate analysis
